# Supplementary material for: Droplet migration on hydrophobic–hydrophilic hybrid surfaces: a lattice Boltzmann study
Source: Royal Society of Chemistry journal article supplement (doi:10.1039/c6ra28665h), 2017-01-01
Supplement: c6ra28665h1.pdf [file c6ra28665h1.pdf]

## Electronic Supplementary Information (ESI)

### Droplet migration on hydrophobic-hydrophilic hybrid surfaces: A lattice

#### Boltzmann study

Q. Li,\* Y. Yu, P. Zhou, and H. J. Yan

School of Energy Science and Engineering, Central South University, Changsha 410083, China

\*Corresponding author: qingli@csu.edu.cn

#### Determination of the contact angles

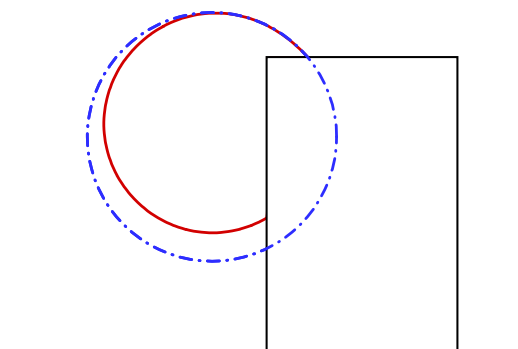

**Fig. S1.** Illustration of the circle fitting method. The dashed circle denotes the fitting circle for determining the contact angle  $\theta_A$ . The contact angle  $\theta_B$  in Fig. 3 is determined in a similar way.
